# Supplementary material for: Manipulating the interfacial water structure by electron redistribution for the hydrogen evolution reaction
Source: Royal Society of Chemistry journal article supplement (doi:10.1039/d4nr02879a), 2024-01-01
Supplement: d4nr02879a1.pdf [file d4nr02879a1.pdf]

## Supplementary information

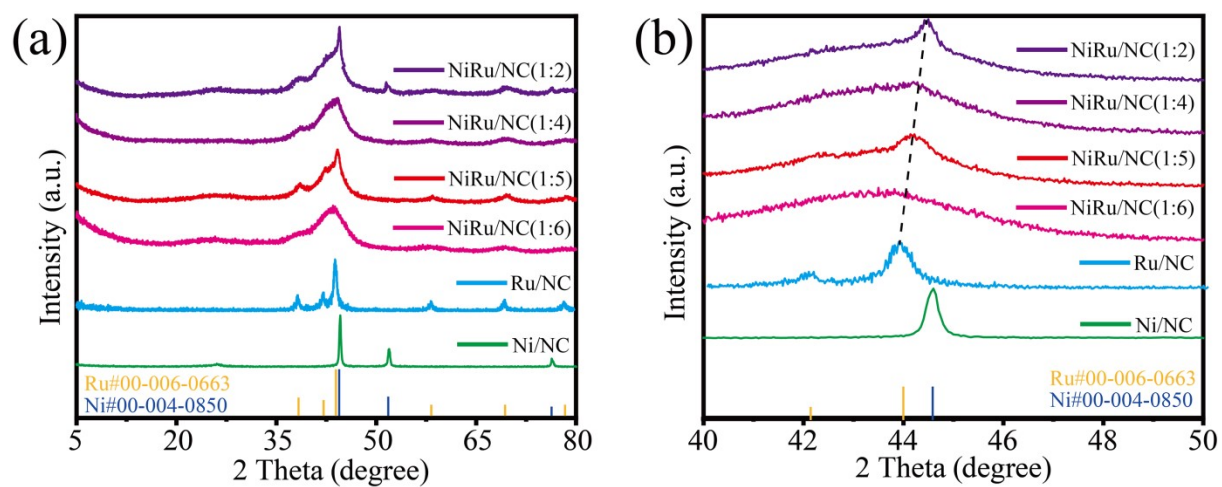

**Figure S1** NiRu alloy supported on nitrogen-doped carbon with different Ni/Ru ratio in synthesis

(a) XRD patterns, (b) local magnification

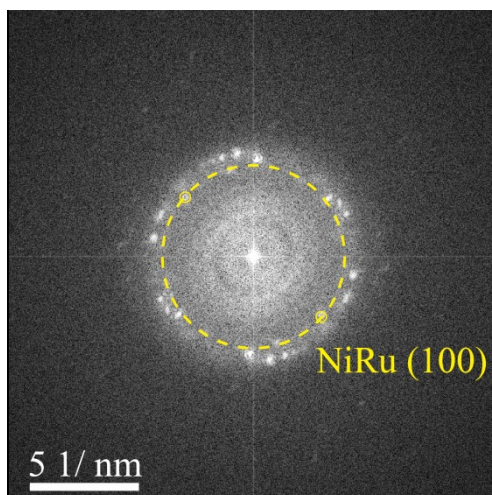

**Figure S2** Selected area electron diffraction (SAED) image of NiRu/NC from Figure 1d.

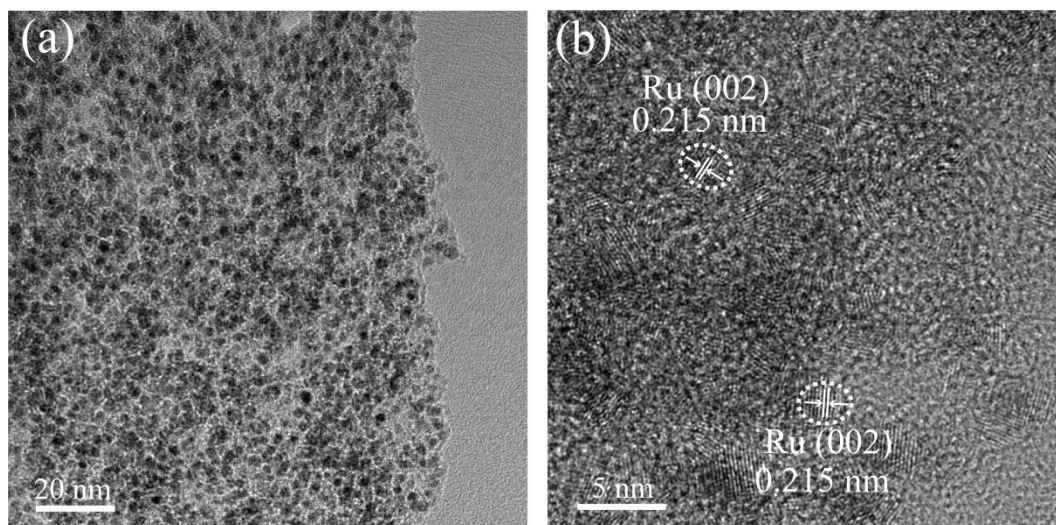

**Figure S3** a) and b) TEM and HRTEM image of Ru/NC.

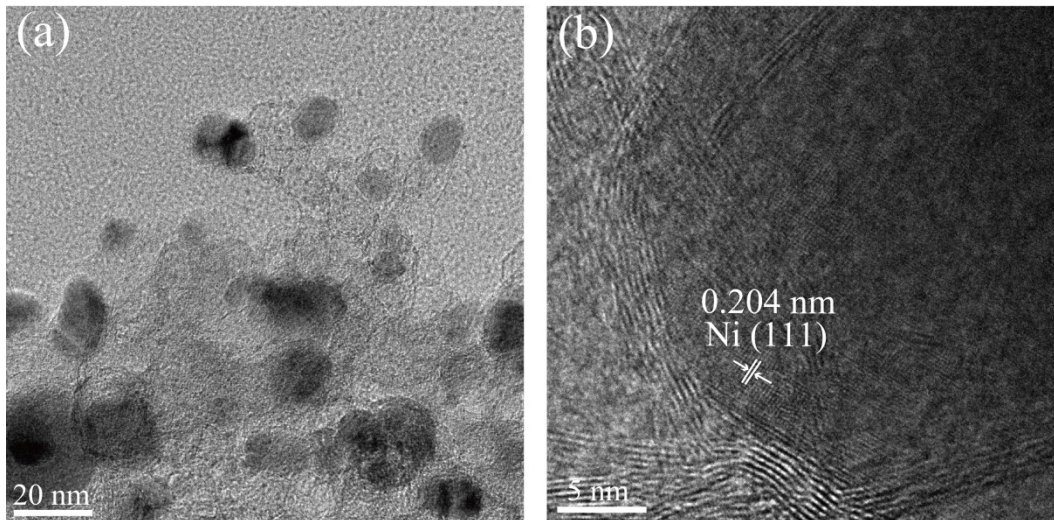

**Figure S4** a) and b) TEM and HRTEM image of Ni/NC.

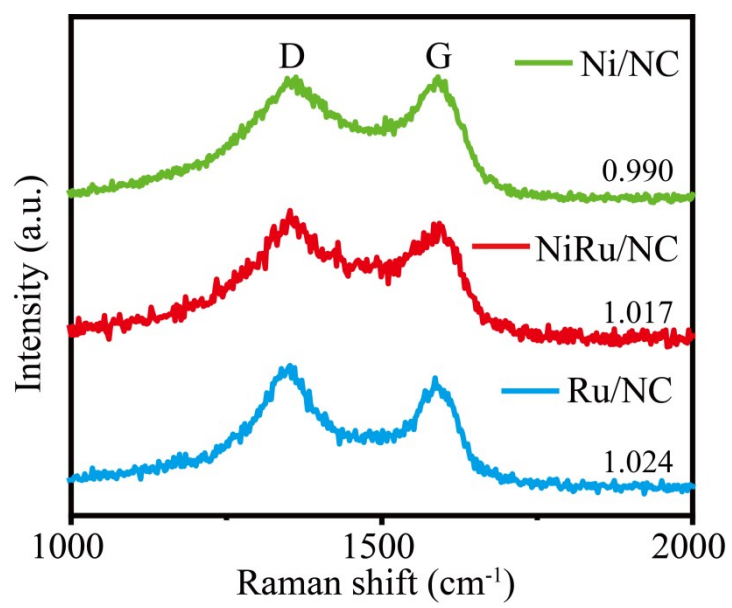

**Figure S5** Raman spectra of NiRu/NC, Ru/NC and Ni/NC.

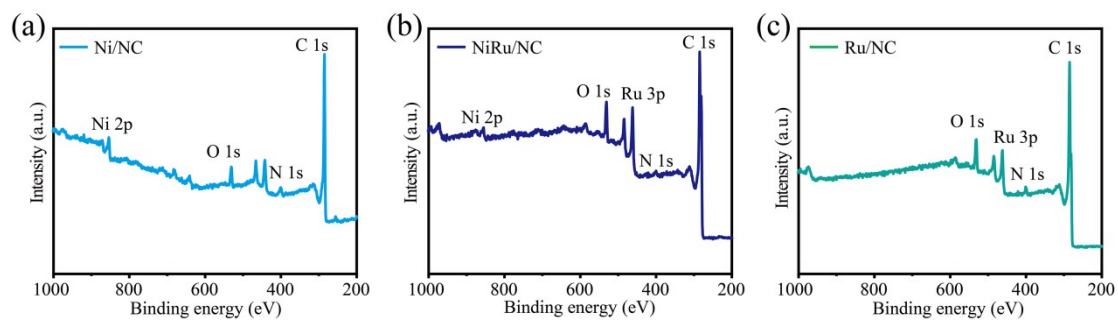

**Figure S6** X-ray photoelectron spectroscopy studies. XPS full survey spectra of a) Ni/NC, b) NiRu/NC and c) Ru/NC

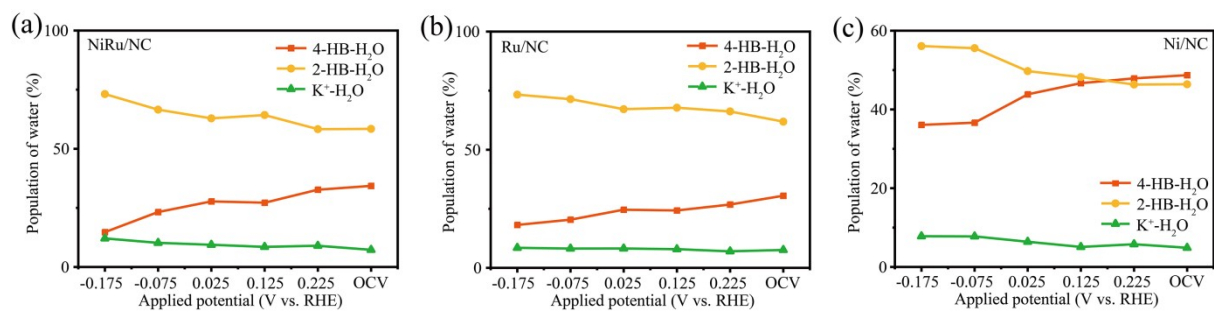

**Figure S7** The population of 4-HB-H<sub>2</sub>O, 2-HB-H<sub>2</sub>O and K<sup>+</sup>-H<sub>2</sub>O at different potentials in a) NiRu/NC , b) Ru/NC, and c) Ni/NC.

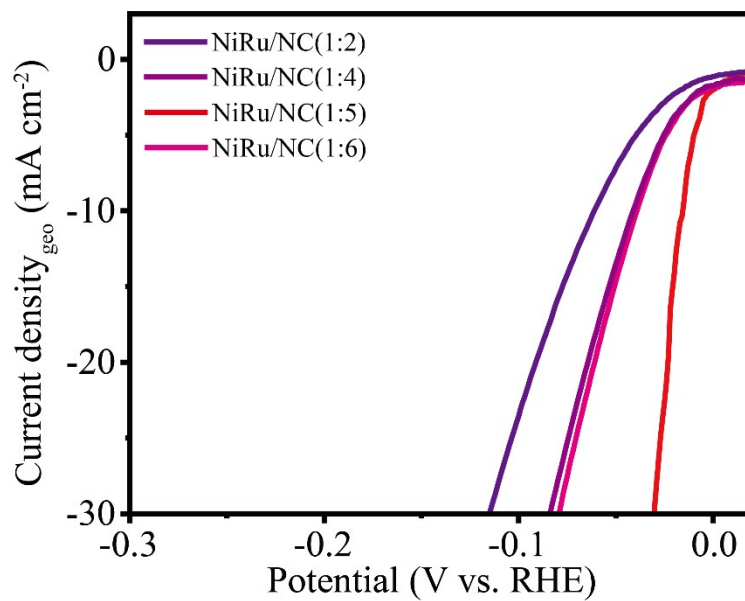

**FigureS8** LSV curves of NiRu alloys supported on nitrogen-doped carbon with Ni/Ru ratio from 1:6 to 1:2 in synthesis.



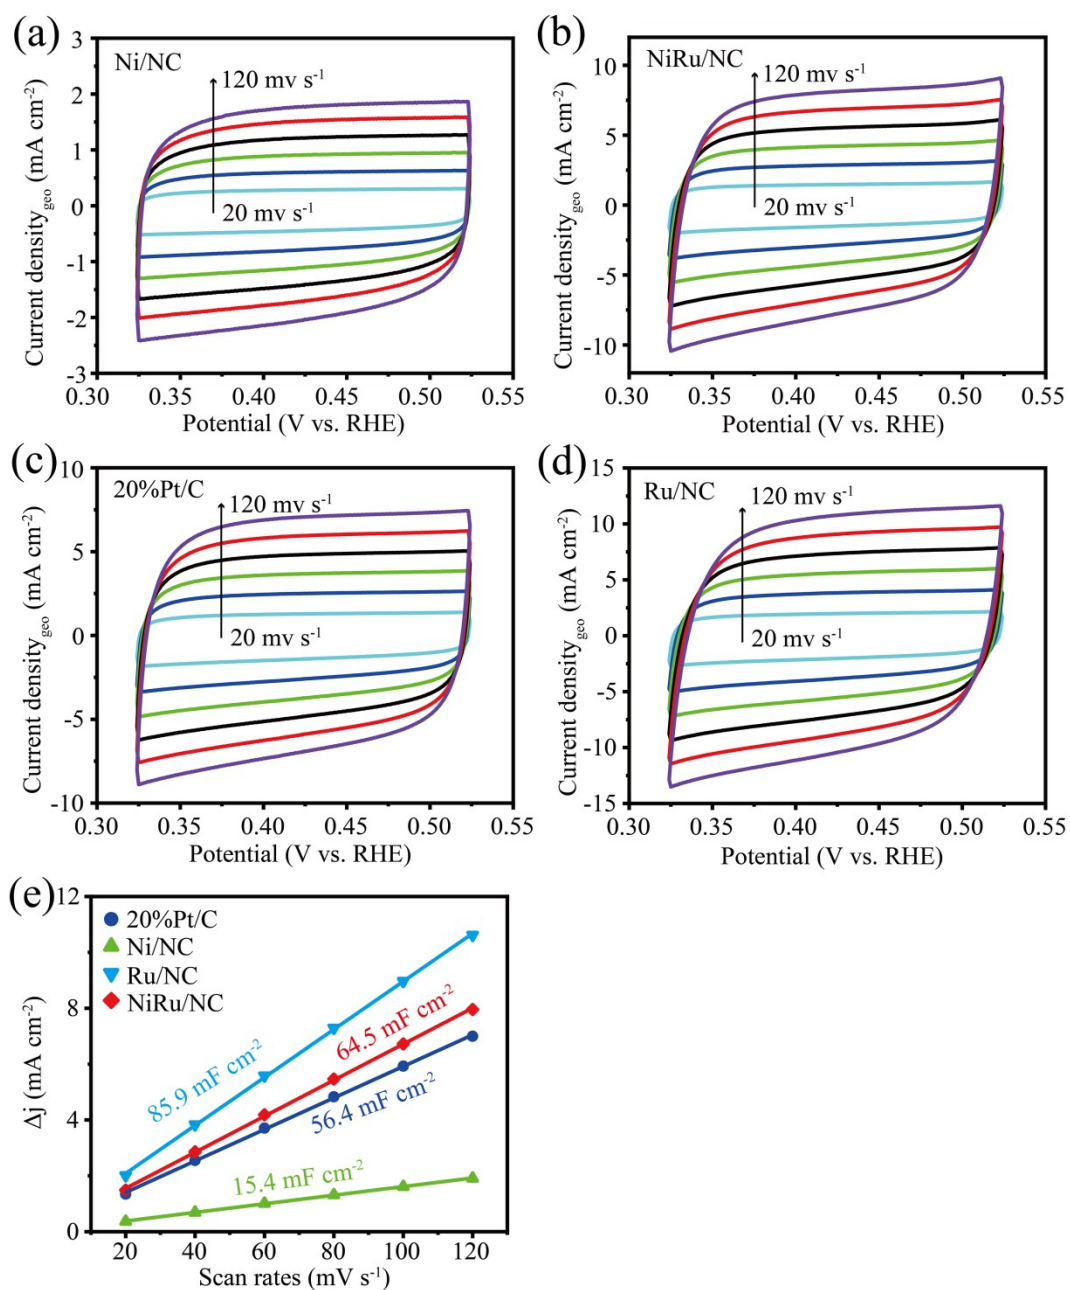

**Figure S9.** a), b), c) and d) CV curves of the Ni/NC, NiRu/NC, 20% Pt/C and Ru/NC obtained at different scan rates between 20 mV and 120 mV in 1 M KOH, respectively. e) Fitting results of double layer capacitance ( $C_{dl}$ ) among all samples.

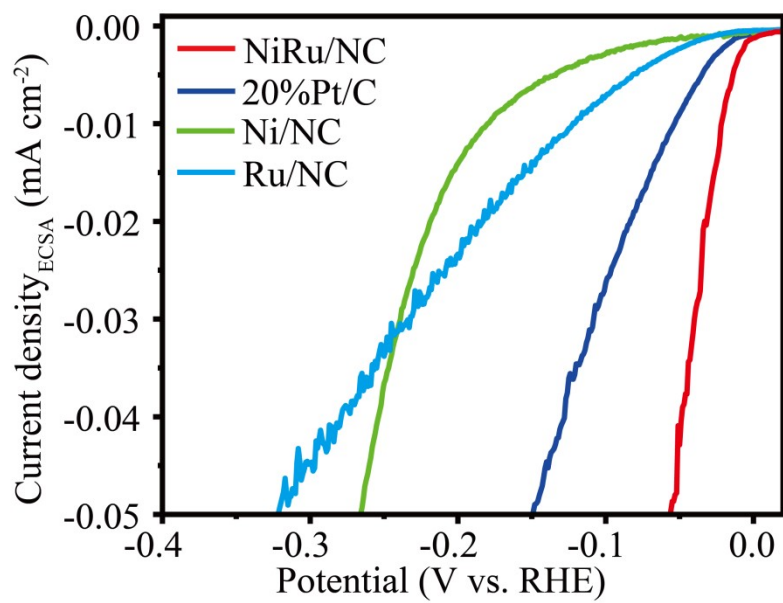

**Figure S10** LSV curves normalized by ECSA of NiRu/NC, Ru/NC, Ni/NC and 20% Pt/C.

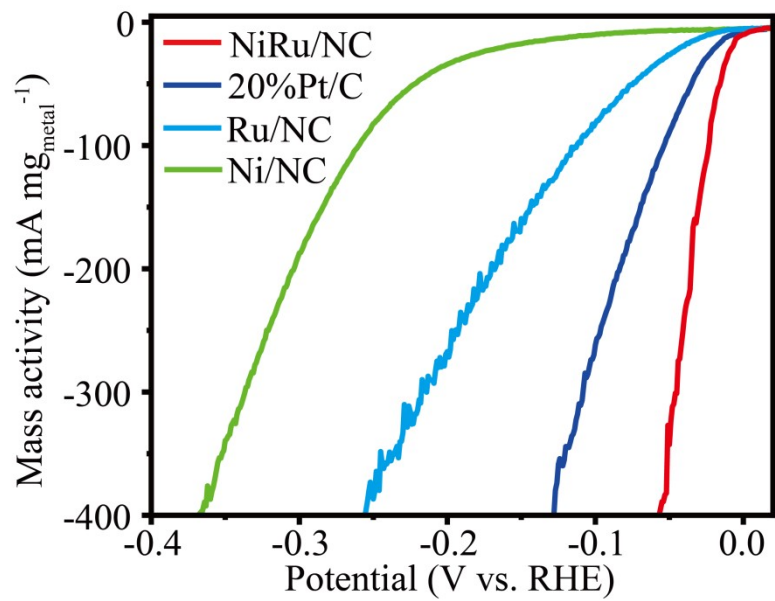

**Figure S11** The mass activity curves of the tested catalysts.

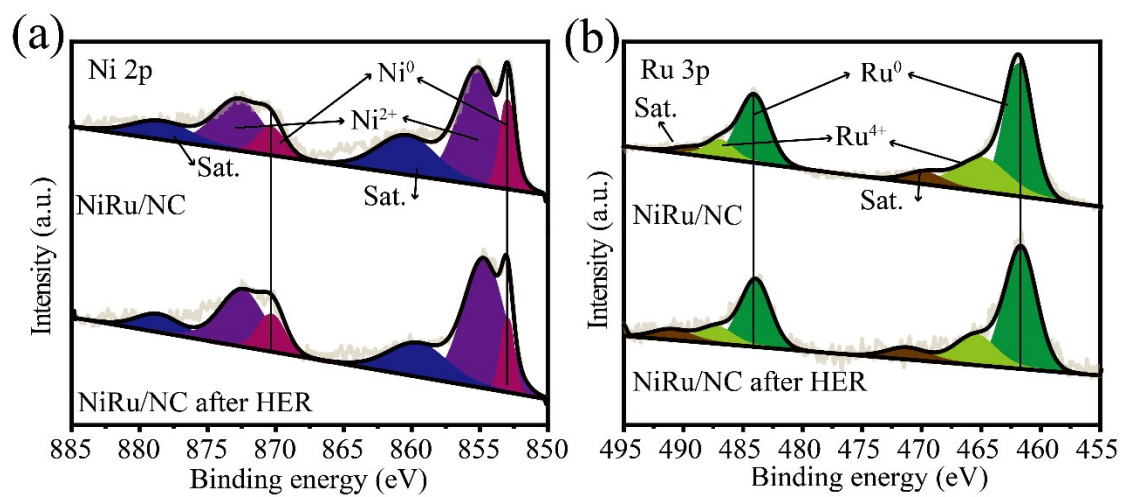

**Figure S12** High-resolution XPS spectra for a) Ni 2p and b) Ru 3p of NiRu/NC after long-time stability test.

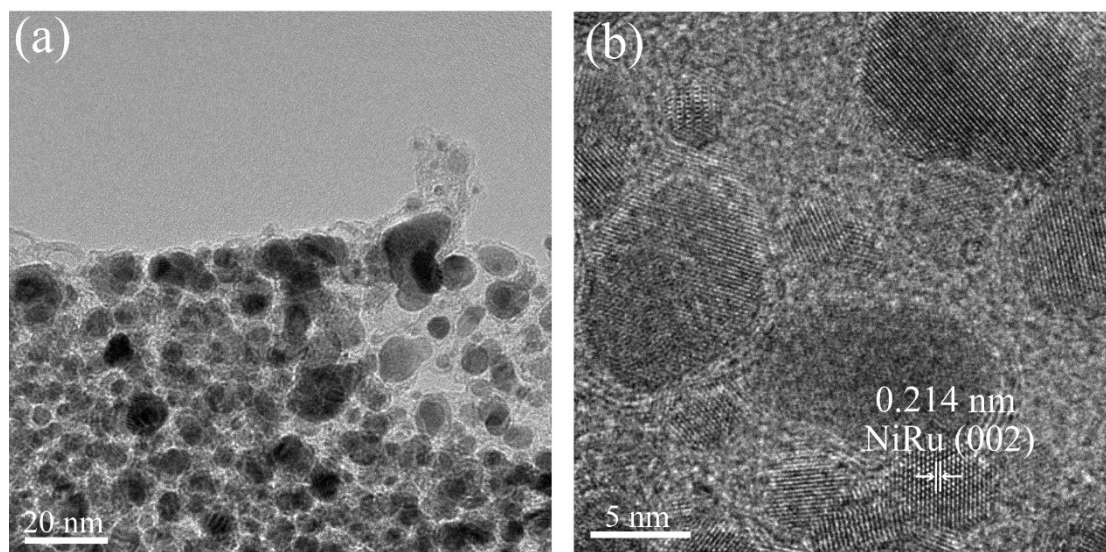

**Figure S13** a) and b) TEM image of NiRu/NC after long-term HER test.

**Table S1.** Comparison of HER activity data of NiRu/NC, Ni/NC and Ru/NC.

| <b>Sample</b>                                    | <b>NiRu/NC</b> | <b>Ru/NC</b> | <b>Ni/NC</b> | <b>20% Pt/C</b> |
|--------------------------------------------------|----------------|--------------|--------------|-----------------|
| <b>geo-<math>\eta_{10}</math> (mV)</b>           | 16             | 78           | 228          | 43              |
| <b>Tafel slope (mV dec<sup>-1</sup>)</b>         | 23.2           | 103.2        | 131.0        | 58.1            |
| <b>C<sub>dl</sub> (mF cm<sup>-2</sup>)</b>       | 64.5           | 85.9         | 15.4         | 56.4            |
| <b>ECSA (cm<sup>-2</sup>)</b>                    | 113.98         | 151.68       | 27.18        | 99.54           |
| <b>ECSA-<math>\eta_{0.05}</math> (mV)</b>        | 56             | 326          | 266          | 149             |
| <b>Mass activity-<math>\eta_{10}</math> (mV)</b> | 30             | 139          | 281          | 67              |
| <b>R<sub>ct</sub> (<math>\Omega</math>)</b>      | 5.9            | 6.5          | 14.1         | 6.7             |

**Table S2.** The HER performance of NiRu/NC compared with other recently-reported HER electrocatalysts in 1 M KOH.

| No. | Catalyst                                     | $\eta_{10}$ (mV) | References |
|-----|----------------------------------------------|------------------|------------|
| 1   | NiRu/NC                                      | 16               | This work  |
| 2   | Pt-Ru/RuO <sub>2</sub>                       | 18               | 1          |
| 3   | Ir@Ni-NDC                                    | 19               | 2          |
| 4   | V-S-Ru/C                                     | 21               | 3          |
| 5   | RhP <sub>2</sub> /Rh@NPG                     | 21.3             | 4          |
| 6   | P-Co/NF                                      | 23               | 5          |
| 7   | Pt <sub>1</sub> /(Co,Ni)(OH) <sub>2</sub> /C | 24               | 6          |
| 8   | Pt-ACs/CoNC                                  | 24               | 7          |
| 9   | Y,Co-CeO <sub>2</sub>                        | 27               | 8          |
| 10  | Ru@CDs                                       | 30               | 9          |
| 11  | Ni@IrNi                                      | 33               | 10         |
| 12  | RuBNC2000                                    | 41               | 11         |
| 13  | PtRu/CNT@SnO <sub>2-x</sub>                  | 53               | 12         |
| 14  | Ru-MoCoP                                     | 55               | 13         |
| 15  | RhPd metallene                               | 59               | 14         |
| 16  | Pt-V <sub>2</sub> CT <sub>x</sub>            | 68               | 15         |

## Reference

1. Y. M. Zhu, M. Klingenhof, C. L. Gao, T. Koketsu, G. Weiser, Y. C. Pi, S. H. Liu, L. J. Sui, J. R. Hou, J. Y. Li, H. M. Jiang, L. M. Xu, W. H. Huang, C. W. Pao, M. H. Yang, Z. W. Hu, P. Strasser and J. W. Ma, *Nat. Commun.*, 2024, **15**, 1447.
2. J. Yang, Y. Shen, Y. M. Sun, J. H. Xian, Y. J. Long and G. Q. Li, *Angew. Chem. Int. Edit.*, 2023, **62**, e202302220.
3. Q. K. Wu, W. J. Yang, X. D. Wang, W. Zhu, S. S. Lv, Y. Zhou, T. Y. Chen, S. H. Liu, W. Y. Li and Z. Chen, *Appl. Catal. B-Environ.*, 2023, **335**, 122896.
4. Y. H. Liu, J. Ding, F. H. Li, X. Z. Su, Q. T. Zhang, G. J. Guan, F. X. Hu, J. C. Zhang, Q. L. Wang, Y. C. Jiang, B. Liu and H. B. Yang, *Adv. Mater.*, 2023, **35**, 2207114.
5. Z. H. Zang, Y. Y. Ren, C. Y. Fan, Y. H. Cheng, L. L. Li, X. F. Yu, X. J. Yang, Z. M. Lu, X. H. Zhang and H. Liu, *Appl. Catal. B-Environ.*, 2024, **350**, 123912.
6. A. Pei, R. K. Xie, Y. Zhang, Y. L. Feng, W. Z. Wang, S. F. Zhang, Z. A. Huang, L. H. Zhu, G. L. Chai, Z. Q. Yang, Q. S. Gao, H. Q. Ye, C. X. Shang, B. H. Chen and Z. X. Guo, *Energy Environ. Sci.*, 2023, **16**, 1035-1048.
7. Y. F. Zhao, P. V. Kumar, X. Tan, X. X. Lu, X. F. Zhu, J. J. Jiang, J. Pan, S. B. Xi, H. Y. Yang, Z. P. Ma, T. Wan, D. W. Chu, W. J. Jiang, S. C. Smith, R. Amal, Z. J. Han and X. Y. Lu, *Nat. Commun.*, 2022, **13**, 2430.
8. X. J. Liu, S. C. Wei, S. Y. Cao, Y. G. Zhang, W. Xue, Y. J. Wang, G. H. Liu and J. D. Li, *Adv. Mater.*, 2024, **36**, 2405970.
9. Z. L. Liu, B. Q. Li, Y. J. Feng, D. C. Jia, C. C. Li, Q. F. Sun and Y. Zhou, *Small*, 2021, **17**, 2102496.
10. J. Xu, X. Y. Wang, X. N. Mao, K. Feng, J. B. Xu, J. Zhong, L. Wang, N. Han and Y. G. Li, *Energy Environ. Sci.*, 2023, **16**, 6120-6126.
11. Y. Liu, L. W. Xing, Y. Q. Liu, D. X. Lian, M. H. Chen, W. W. Zhang, K. Wu, H. D. Zhu, Z. Y. Sun, W. X. Chen, P. Wu, D. S. Wang and Y. J. Ji, *Appl. Catal. B-Environ.*, 2024, **353**, 124088.
12. C. A. Zhou, K. Ma, Z. C. Zhuang, M. L. Ran, G. Q. Shu, C. Wang, L. Song, L. R. Zheng, H. R. Yue and D. S. Wang, *J. Am. Chem. Soc.*, 2024, **146**, 21453-21465.



13. M. Bi, Y. Zhang, X. H. Jiang, J. W. Sun, X. Wang, J. W. Zhu and Y. S. Fu, *Adv. Funct. Mater.*, 2024, **34**, 2309330.
14. Z. Q. Wang, G. H. Yang, P. J. Tian, K. Deng, H. J. Yu, Y. Xu, X. N. Li, H. J. Wang and L. Wang, *J. Mater. Chem. A*, 2023, **11**, 10222-10227.
15. S. Park, Y. L. Lee, Y. Yoon, S. Y. Park, S. Yim, W. Song, S. Myung, K. S. Lee, H. Chang, S. S. Lee and K. S. An, *Appl. Catal. B-Environ.*, 2022, **304**, 120989.
